# Supplementary material for: A novel & effective visible light-driven TiO2/magnetic porous graphene oxide nanocomposite for the degradation of dye pollutants
Source: Royal Society of Chemistry journal article supplement (doi:10.1039/c6ra02827f), 2016-01-01
Supplement: c6ra02827f1.pdf [file c6ra02827f1.pdf]

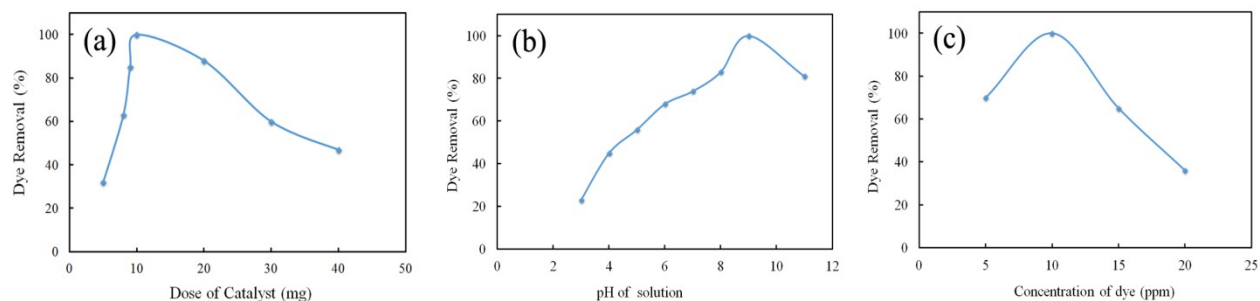

Fig. s1. Effect of dose of catalyst on the photodegradation of RhB dye (a) effect of the pH on the photodegradation of RhB (b) and effect of initial concentration of RhB (c).

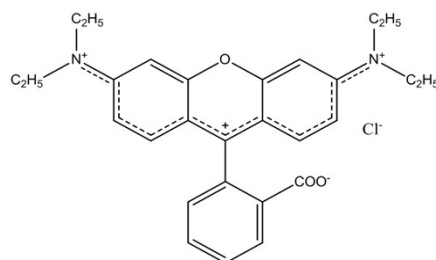

Fig. s2. The zwitter ion of Rhodamine B.
